# Supplementary material for: Lanthanide triple helical complexes with a chiral ligand derived from 2,6-pyridinedicarboxylic acid†
Source: Royal Society of Chemistry journal article supplement (doi:10.1039/b102728j), 2001-01-01
Supplement: b102728j.doc [file b102728j.doc]

Lanthanide triple helical complexes with a chiral ligand derived from 2,6-pyridine-dicarboxylic acid

**_______________________________________________________**

**Gilles Muller,a Boris Schmidt,b, c Jan Jiricek,c Gérard Hopfgartner,d James P. Riehl,e Jean-Claude G. Bünzli,[[1]](#footnote-2), a Claude Piguetf**

*a Institute of Inorganic and Analytical Chemistry, BCH, University of Lausanne, CH-1015 Lausanne, Switzerland*

*b Novartis Pharma AG, Nervous System, WKL 136.5.82, CH-4002 Basel, Switzerland*

*c* *Department of Organic Chemistry, University of Hannover, Schneiderberg 1b, D-30167 Hannover, Germany*

d F. Hoffmann-La Roche Ltd, Pharmaceuticals Division, PRNS 68/142, CH-4070 Basel, Switzerland

e *Department of Chemistry, University of Minnesota Duluth, Minnesota 55812-2496, USA*

*f Department of Inorganic, Analytical and Applied Chemistry, University of Geneva, 30 quai E. Ansermet, CH-1211 Geneva 4, Switzerland.*

## Supporting Information

(5 pages)

**Table S1** Identified molecular species in the titration of L4 (10-4 M in anhydrous MeCN) by Ln(ClO4)3·*x*H2O (*x* = 0.3-0.6, Ln = La, Eu, Lu) at 298 K; molecular ratios *R* = [L4]*t*/ [Ln(III)]*t* = 0-3, as determined by ES-MS. L4' is the primary amine generated by the splitting of the *Boc* group from L4.

| Species | | *m/z* obs. | | *m/z* calc. | | Species | | *m/z* obs. | | *m/z* calc. | |
| --- | --- | --- | --- | --- | --- | --- | --- | --- | --- | --- | --- |
| [(L4)+3H]3+ | | 160.5 | | 160.4 | | [(L4)+Na]+ | | 501.3 | | 501.3 | |
| [(L4)(CH3CN)+3H]3+ | | 174.1 | | 174.1 | | [La(L4)3]3+ | | 524.6 | | 524.6 | |
| [(L4')+3H+9H2O]3+ | | 181.1 | | 181.1 | | [La(L4)(L4')(ClO4)]2+ | | 547.3 | | 547.2 | |
| [La(L4)(CH3CN)3]3+ | | 246.8 | | 246.7 | | [La(L4')4(CH3CN)+H2O]3+ | | 570.3 | | 570.3 | |
| [(L4)+2H+2H2O]2+ | | 258.1 | | 258.2 | | [La(L4)2(ClO4)]2+ | | 597.3 | | 597.2 | |
| [(L4')(CH3CN)+2H+10H2O]2+ | | 300.6 | | 300.7 | | [La(L4)2(L4')2]3+ | | 617.4 | | 617.3 | |
| [La(L4)(CH3CN)8+H2O]3+ | | 321.1 | | 321.1 | | [2(L4')+H]+ | | 757.6 | | 757.5 | |
| [La(L4)2]3+ | | 365.3 | | 365.3 | | [La(L4)3(ClO4)]2+ | | 836.5 | | 836.4 | |
| [(L4')+H]+ | | 379.2 | | 379.2 | | [(L4)(L4')+H]+ | | 857.6 | | 857.5 | |
| [La(L4)(L4')]3+ | | 457.6 | | 457.9 | | [2(L4)+Na]+ | | 979.6 | | 979.5 | |
| [(L4)+H]+ | | 479.4 | | 479.3 | | [La(L4)4(ClO4)]2+ | | 1075.6 | | 1075.6 | |
| [La(L4)2(L4')]3+ | | 491.2 | | 491.2 | | [La(L4)2(ClO4)2]+ | | 1293.4 | | 1293.4 | |
| [(L4')+3H+H2O]3+ | 133.0 | | 133.1 | | [Eu(L4)2(L4')]3+ | | 496.0 | | 495.9 | |  |
| [(L4')+3H+9H2O]3+ | 181.1 | | 181.1 | | [Eu(L4')2(ClO4)]2+ | | 504.2 | | 504.2 | |  |
| [(L4')+2H+2H2O]2+ | 208.0 | | 208.1 | | [Eu(L4)3]3+ | | 529.3 | | 529.3 | |  |
| [Eu(L4')2]3+ | 303.2 | | 303.1 | | [Eu(L4)(L4')(ClO4)]2+ | | 554.3 | | 554.2 | |  |
| [Eu(L4')2+4H2O]3+ | 327.2 | | 327.1 | | [Eu(L4)2(ClO4)]2+ | | 604.3 | | 604.2 | |  |
| [Eu(L4)2]3+ | 369.9 | | 369.8 | | [Eu(L4)4]3+ | | 688.8 | | 688.7 | |  |
| [(L4')+H]+ | 379.3 | | 379.2 | | [Eu(L4)(L4')2(ClO4)]2+ | | 743.5 | | 743.3 | |  |
| [Eu(L4')3]3+ | 429.3 | | 429.2 | | [Eu(L4)3(ClO4)]2+ | | 843.5 | | 843.4 | |  |
| [Eu(L4)(L4')2]3+ | 462.7 | | 462.6 | | [Eu(L4)4(ClO4)]2+ | | 1082.6 | | 1082.5 | |  |
| [(L4)(CH3CN)+3H]3+ | 192.1 | | 192.1 | | [Lu(L4)2(L4')]3+ | | 503.3 | | 503.2 | |  |
| [(L4)(L4')(CH3CN)+11H2O]3+ | 264.2 | | 264.1 | | [Lu(L4')2(ClO4)]2+ | | 515.3 | | 515.2 | |  |
| [Lu(L4')2]3+ | 310.5 | | 310.5 | | [Lu(L4)3]3+ | | 536.7 | | 536.6 | |  |
| [Lu(L4)(L4')]3+ | 343.9 | | 343.8 | | [Lu(L4)(L4')(ClO4)]2+ | | 565.3 | | 565.2 | |  |
| [Lu(L4)2]3+ | 377.2 | | 377.2 | | [Lu(L4)2(ClO4)]2+ | | 615.3 | | 615.2 | |  |
| [(L4')+H]+ | 379.3 | | 379.2 | | [Lu(L4)4]3+ | | 696.1 | | 696.0 | |  |
| [Lu(L4)2(CH3CN)+2H2O]3+ | 402.9 | | 402.9 | | [Lu(L4)(L4')2(ClO4)]2+ | | 754.4 | | 754.3 | |  |
| [Lu(L4')3]3+ | 436.6 | | 436.5 | | [Lu(L4)4(CH3CN)8]3+ | | 805.3 | | 805.4 | |  |
| [Lu(L4)(L4')2]3+ | 470.0 | | 469.9 | | [Lu(L4)3(ClO4)]2+ | | 854.4 | | 854.4 | |  |
| [(L4)+Na]+ | 501.3 | | 501.3 | | [Lu(L4')2(ClO4)2]+ | | 1129.4 | | 1129.3 | |  |


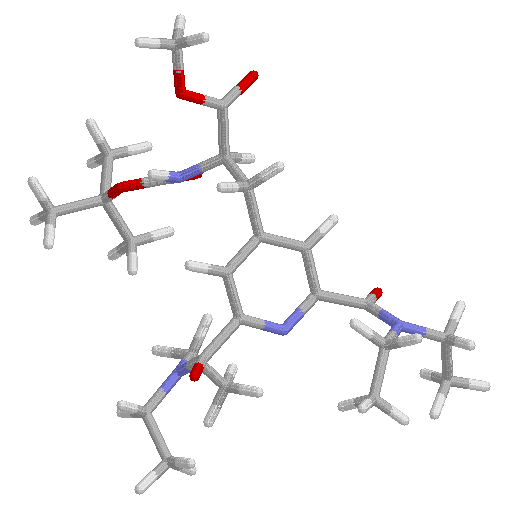


**Fig. S1** Geometric optimisation of ligand L4 as obtained by AM1 calculations.

**Fig. S2** 1H-NMR spectra (360.16 MHz) obtained while monitoring the titration of L4 (5 x 10-3 M in anhydrous CD3CN) by La(ClO4)3·0.3H2O at 298 K. The asterisk and the dot indicate signals from solvent and water, respectively.

**Fig. S3** 1H-NMR signals (400.03 MHz) arising from protons H8,10,14 of [Lu(L4)3]3+ 5 x 10-3 M in anhydrous CD3CN, measured as a function of temperature.

**Fig. S4** Part of the 13C-NMR spectra of [Ln(L4)3]3+ complexes 5 x 10-3 M in CD3CN *vs.* temperature.

**Fig. S5** UV-vis spectra of L4 and its [Ln(L4)3]3+ complexes, 10-3 M in anhydrous CH3CN at 295 K.

**Fig. S6** Emission spectrum of a solid sample of [Eu(L4)3]3+ *vs* temperature. Excitation: 25 189 cm-1, bandpass 16-32 cm-1.

1.  Corresponding author; e-mail : jean-claude.bunzli@icma.unil.ch [↑](#footnote-ref-2)
